# Supplementary material
Source: publisher figshare collection journal article supplement (https://tandf.figshare.com/articles/dataset/_/16574274)

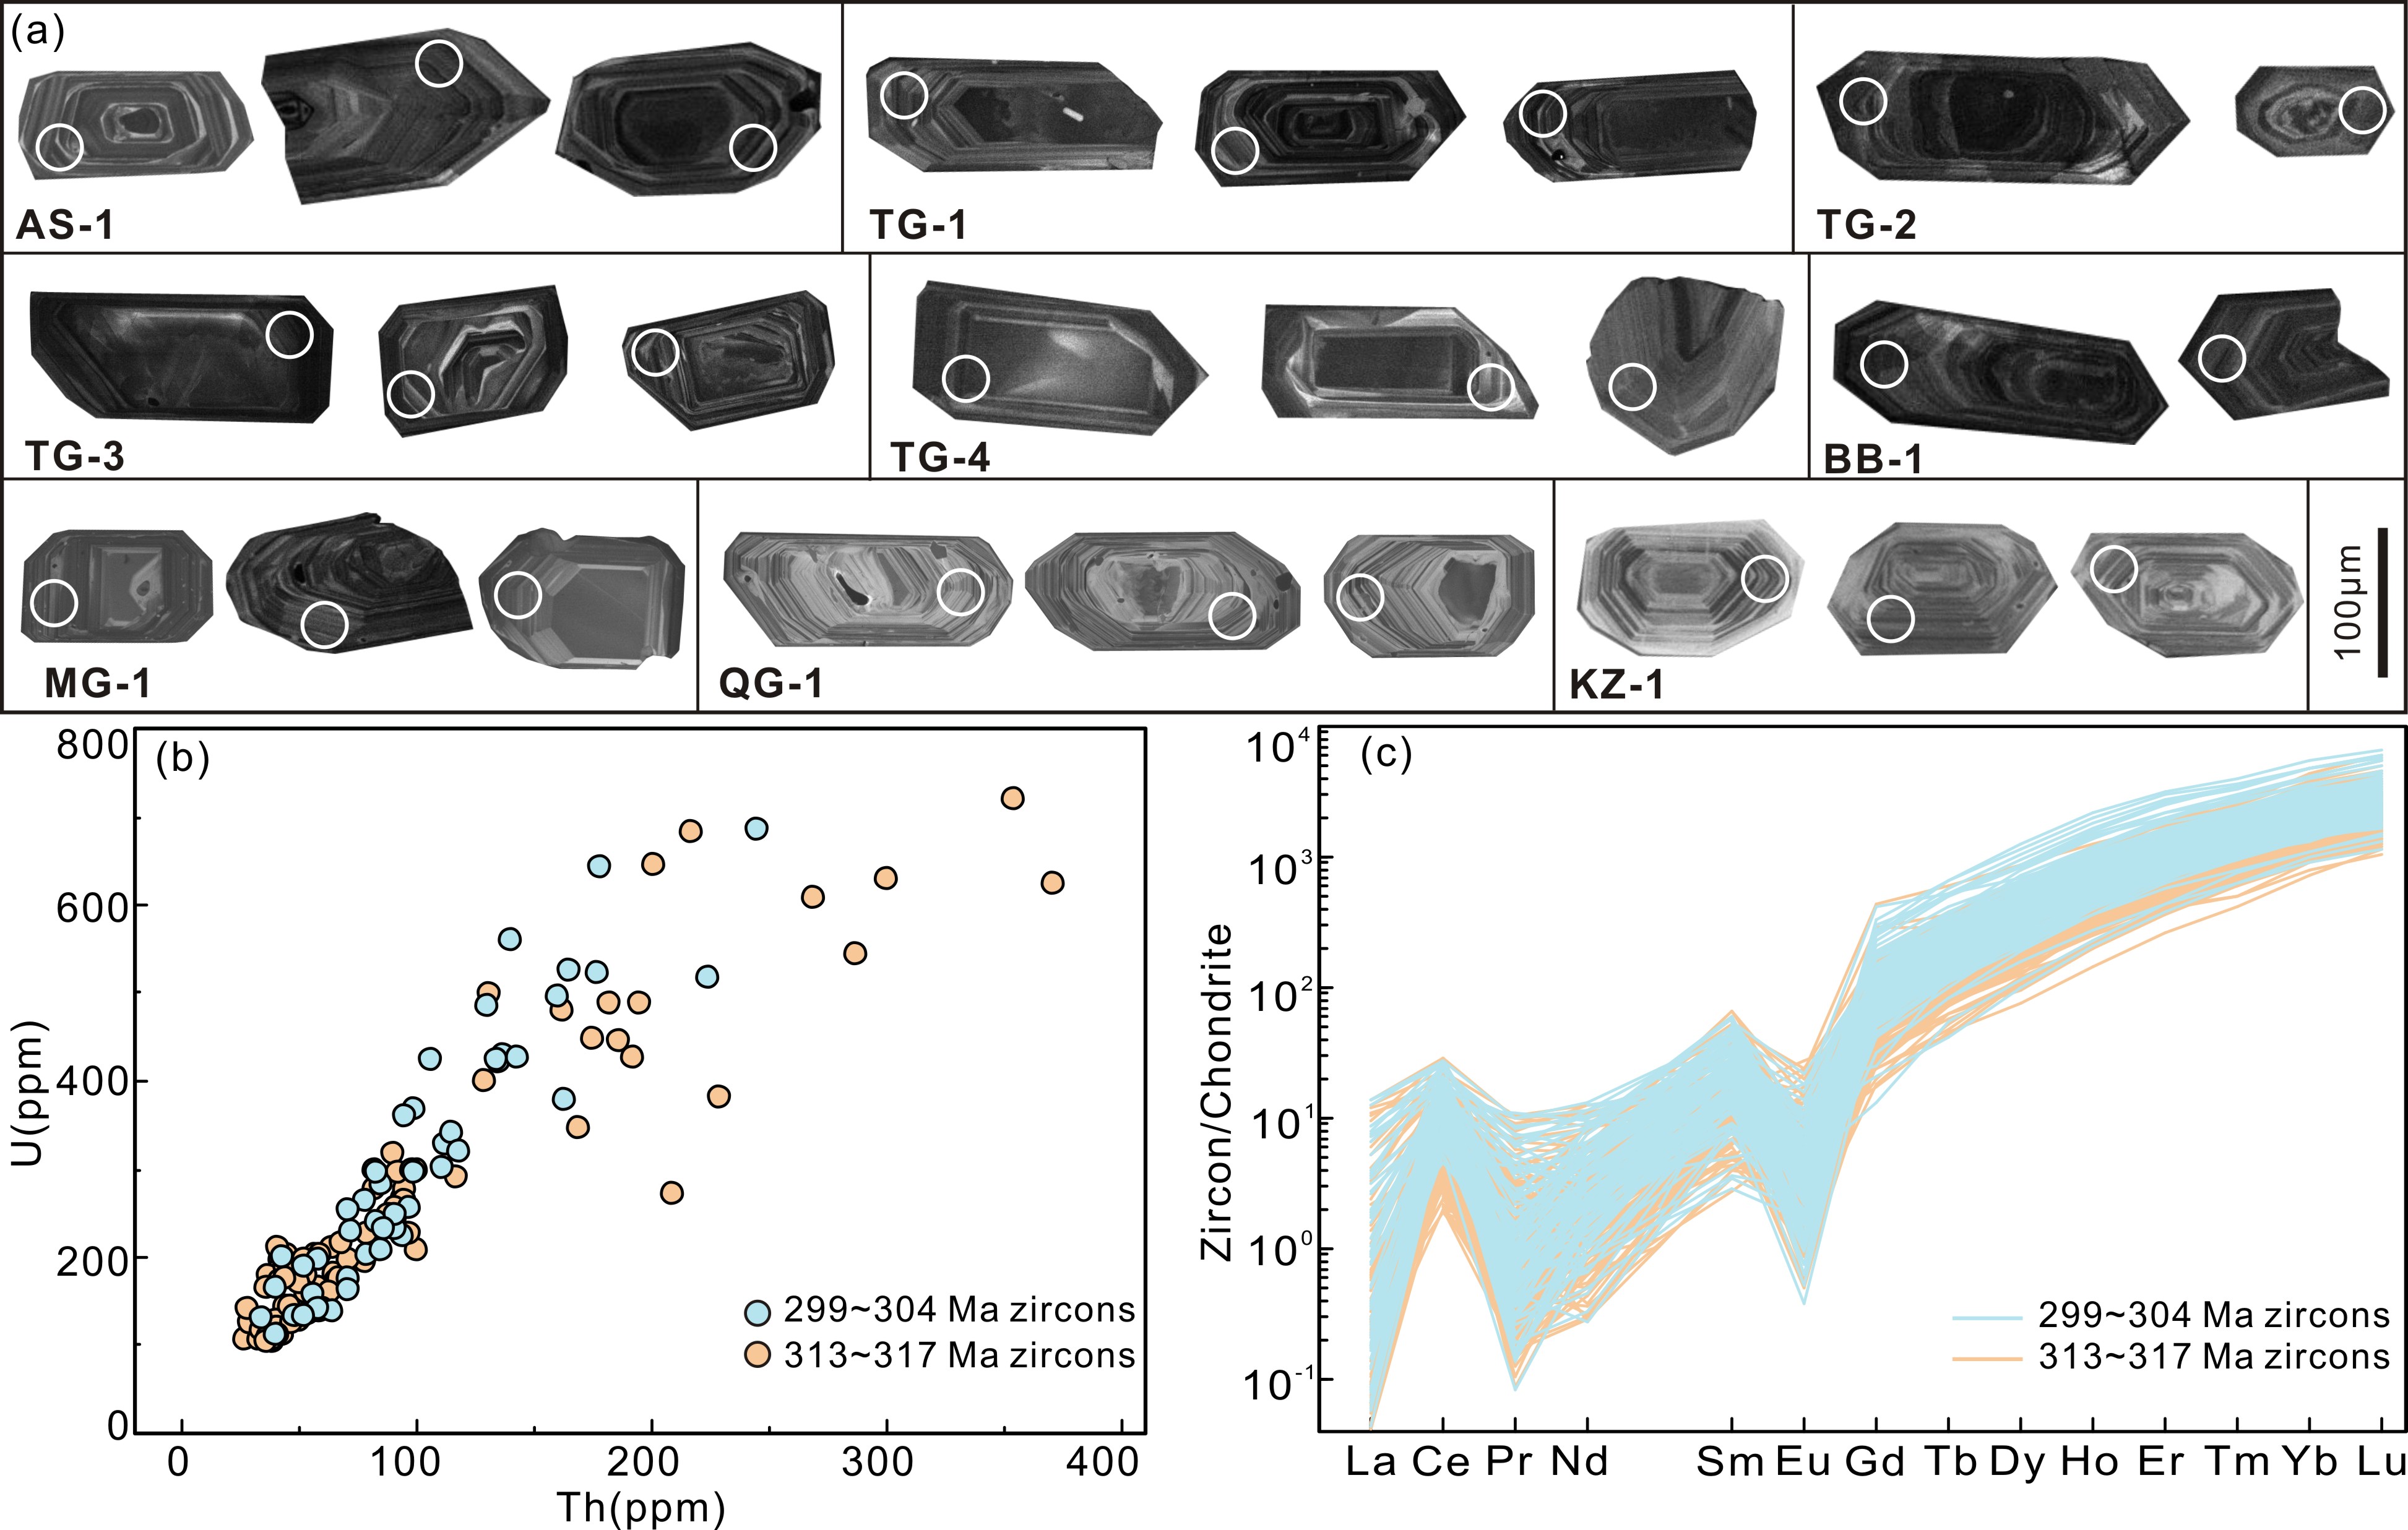


**Supp. Figure 1**

**
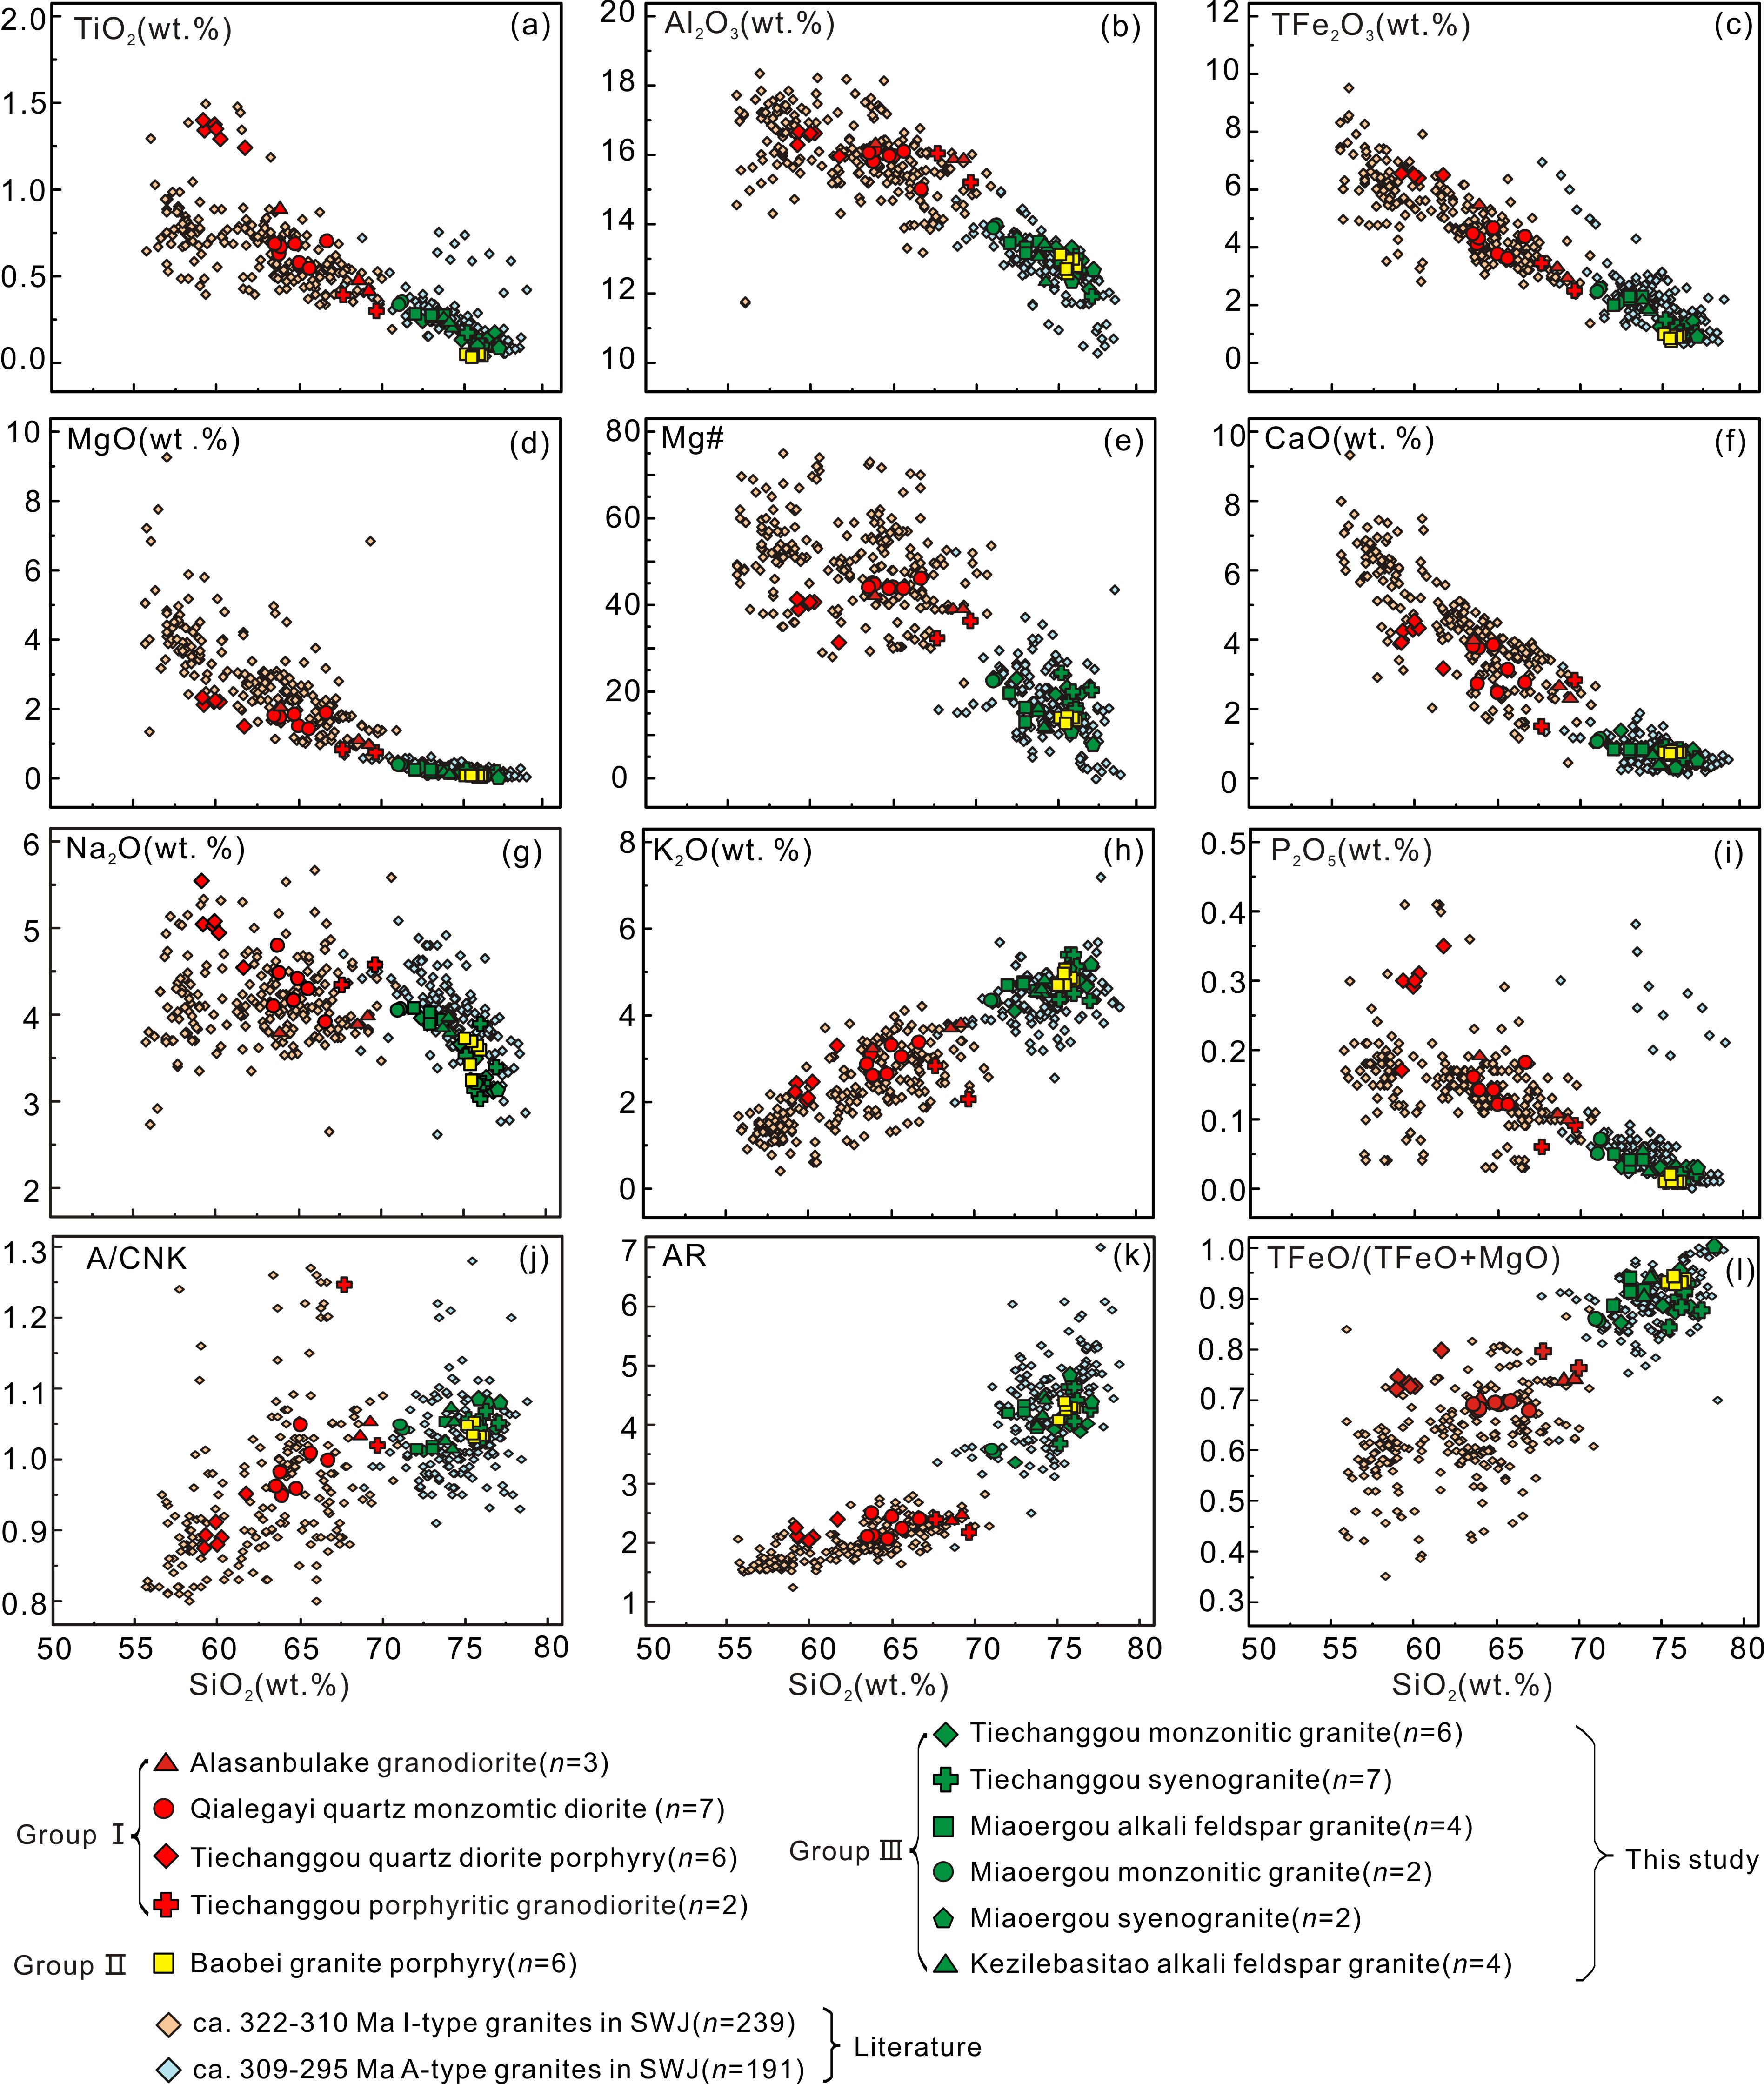
**

**Supp. Figure 2**

Supplement: Supplementary file 1 [file 2]
